# Supplementary material for: Correction: Joint Estimation of Contamination, Error and Demography for Nuclear DNA from Ancient Humans
Source: PubMed Central journal article supplement (PMC5100944; doi:10.1371/journal.pgen.1006444), 2016-11-08
Supplement: pgen.1006444.s001.pdf [file pgen.1006444.s001.pdf]

## S2 Text. Probabilistic inference using BAM files

Here, we briefly explain the way we infer fragment-specific error parameters in the optional BAM mode of DICE. Let  $\mathbb{R}$  be the set of all fragments in the BAM file, and  $R_j \in \mathbb{R}$  be a particular aligned fragment of length  $l$ . For fragment  $R_j$ , let  $\{b_{j,1}, \dots, b_{j,l}\}$  be the individual nucleotides in the fragment. At each position of the fragment, there is a specific probability  $\kappa_{j,i}$  that the base is erroneous. This probability is provided by the basecaller. Below, we will compute the likelihood of observing a base  $b_{j,i} \in R_j$  under a bi-allelic model, given an error rate  $\kappa_{j,i}$ . Below, we focus on an individual fragment  $R_j$  and an individual position  $i$  on that fragment, so for simplicity, we drop the subscripts  $i$  and  $j$  and we let  $b_{j,i} = b$  and  $\kappa_{j,i} = \kappa$ .

Let  $v$  be the base that was originally sampled at a given site, before deamination or mismapping. This base could be ancestral or derived. Let  $P_{dam}[v \rightarrow b]$  be the probability of substitution from  $v$  to  $b$  due to post-mortem chemical damage. The probabilities of different types of damage (e.g. C→T or G→A) occurring at different positions of a fragment can be computed following Ginolhac et al. [1] and Jónsson et al. [2], producing a matrix that can be provided to DICE as input. We offer the possibility of specifying different post-mortem damage matrices for the endogenous and the contaminant fragments.

Let  $E$  denote the event that a sequencing error has occurred, let  $D$  the event that chemical damage has occurred, let  $M$  be the event that  $R_j$  was correctly mapped and let  $\neg$  denote the complement of an event (i.e. event has not occurred). We define the probability of observing sequenced base  $b$  given that no sequencing error has occurred at a position on a correctly mapped fragment that was originally  $v$ , by summing over two possibilities, either chemical damage occurred or it did not:

$$P[b|v, M, \neg E] = \mathbb{1}(v = b) \cdot P[\neg D] + (1 - \mathbb{1}(v = b)) \cdot P[D] \quad (30)$$

Here,  $\mathbb{1}(v = b)$  is an indicator function that is equal to 1 if  $v$  is equal to  $b$ , and 0 otherwise. The probabilities  $P[D]$  and  $P[\neg D]$  are respectively equal to  $P_{dam}[v \rightarrow b]$  and  $1 - P_{dam}[v \rightarrow b]$ .

Subsequently, we compute  $P[b|v, M]$ , the probability of observing  $b$  given  $v$  under the assumption that  $R_j$  was mapped at the correct genomic location. We have:

$$P[b|v, M] = (1 - \kappa) \cdot P[b|v, M, \neg E] + \kappa \cdot \frac{1}{2} \quad (31)$$

This is because if a sequencing error has occurred, the probability of observing  $b$  is independent of  $v$ , and therefore  $P[b|v, M, E] = \frac{1}{2}$ . Finally, let  $P[M]$  be the probability that the fragment  $R_j$  is mapped at the correct location as given by the mapping quality. The probability of seeing  $b$  given that  $v$  was the base that was sampled before deamination is then:

$$P[b|v] = P[M] \cdot P[b|v, M] + P[\neg M] \cdot \frac{1}{2} \quad (32)$$

The probability of observing  $b$  given that the fragment was mismapped is independent of  $v$ , hence  $P[b|v, \neg M] = \frac{1}{2}$ . If either the base quality or mapping quality indicate a probability of error of 100%,  $P[b|v]$  will be equal to  $\frac{1}{2}$ . These probabilities are used instead of the genome-wide error term  $\epsilon$  in equations 4, 5 and 6. For instance, equation 4 for a specific base  $b$  in fragment  $R_j$  becomes:

$$\begin{aligned} q_2 = & r_C(w \cdot P[b = der|v = der, contaminant] + \\ & (1 - w) \cdot P[b = der|v = anc, contaminant]) + \\ & (1 - r_C) \cdot P[b = der|v = der, ancient] \end{aligned} \quad (33)$$

Here, *der* is the derived base and *anc* is the ancestral base. In case different post-mortem damage matrices are provided by the user for the ancient and the contaminant fragments, the events *contaminant* and *ancient* serve to denote which damage probabilities (i.e.  $P_{dam}$ ) should be used in each case.

## References

1. A. Ginolhac, M. Rasmussen, M. T. P. Gilbert, E. Willerslev, L. Orlando, mapdamage: testing for damage patterns in ancient dna sequences, *Bioinformatics* 27 (2011) 2153–2155.
2. H. Jónsson, A. Ginolhac, M. Schubert, P. L. Johnson, L. Orlando, mapdamage2.0: fast approximate bayesian estimates of ancient dna damage parameters, *Bioinformatics* 29 (2013) 1682–1684.
